# Supplementary material
Source: HighWire-hosted journal article supplement (http://rc.rcjournal.com/highwire/filestream/16387/field_highwire_adjunct_files/1/suppl_2.pdf)

## Supplementary Figure – Scatter Plot

It would be interesting to check the XY plot between the two tests to see if there is any specific pattern (eg, patients with lower values could have more similar results between the tests). This plot does not necessarily have to be included in the paper, but the authors should check it to make sure it does not add important information.

**Response: We have answered this comment in the first Revision. We answered we found your hypothesis very interesting, but when analyzing the scatter plot, there was no influence regarding lower or higher performance on ISWT-H and more or less similarity between tests. We did a scatter plot, but the platform accepts only text as a response. For this reason, below is the scatter plot.**

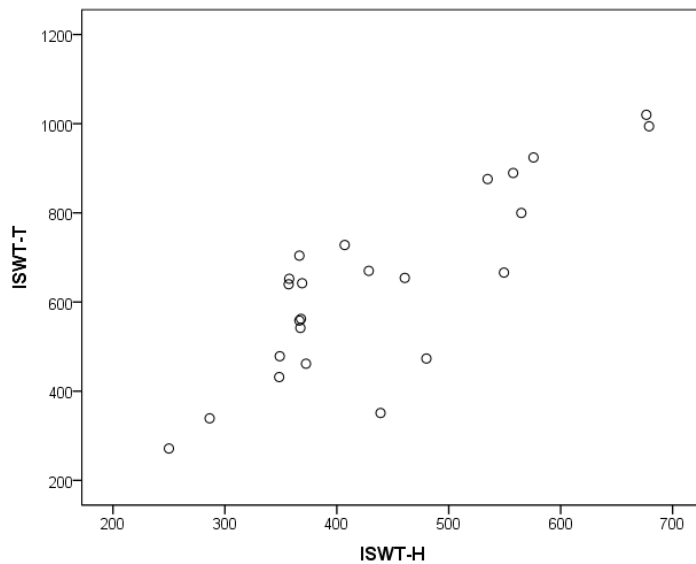

Supplement: suppl_2.pdf [file suppl_2.pdf]
